# Supplementary material
Source: Springer Nature journal article supplement (https://www.springermedizin.de/resource/supplementary/12891_2013_2101_MOESM5_ESM.pdf/9509396)
Supplement: MOESM5 [file 9509396]

Literature Search: MEDLINE,  
EMBASE, CINAHL, the  
Cochrane Library n = 339

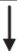

Search results after  
duplicates removed n = 236

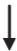

Potentially relevant articles  
for full text review n = 20

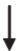

RCT's included in  
systematic review n = 11

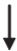

RCT's included in meta-analysis  
Treatment trials n = 4  
Prevention trials n = 6

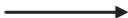

Records excluded on basis  
of Title & Abstract n = 216

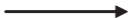

Full text articles excluded  
• not RCT n = 6  
• other condition n = 3

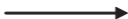

Unable to calculate  
effect size n = 1
